# Supplementary material for: Novel alkyne chromophore of the isophorone derivatives: synthesis, electrochemical evaluation, DFT, and processable bottom contact/top-gate OFET applications
Source: Springer Nature journal article supplement (doi:10.1007/s10854-024-12186-3), 2024-04-01
Supplement: MOESM1 [file 26936750]

#

# Supplementary File

**Novel Alkyne Chromophore of the Isophorone Derivatives: Synthesis, Electrochemical Evaluation, DFT, and Processable Bottom Contact/Top-Gate OFET Applications**

**Betul Canimkurbey*a, Merve Nur Kamsiz Kir b, Serpil Eryilmaz c, Melek Gul*d**

aS. Şerefeddin Health Services Vocational School, Amasya University, 05100, Amasya, Turkey

bDepartment of Chemistry, Institute of Sciences, Amasya University, 05100, Amasya, Turkey

cDepartment of Physics, Faculty of Arts and Sciences, Amasya University, 05100, Amasya, Turkey

dDepartment of Chemistry, Faculty of Arts and Sciences, Amasya University, 05100, Amasya, Turkey

| **Table of Contents** | **Page** |
| --- | --- |
| General Experimental Detail | 2-3 |
| Distributions of electron density in HOMO and LUMO for compounds | 4 |
| The Lippert-Mataga equation | 5 |
| Synthesis Scheme and Spectral Characterization of Compound I/ H NMR, DSC, TGDTA, LCMSMS | 7-6 |
| Synthesis Scheme and Spectral Characterization of Compound II / H-APT NMR, TGDTA, GCMS | 9-8 |
| Synthesis Scheme and Spectral Characterization of Compound III / H-APT- COSY NMR, TGDTA, LCMSMS | 10-11 |
| Synthesis Scheme and Spectral Characterization of Compound IV / H-APT NMR, LCMSMS | 12-13 |
| Synthesis Scheme and Spectral Characterization of Compound V / H-APT NMR, LCMSMS | 14-15 |
| Synthesis Scheme and Spectral Characterization of Compound VI / H-APT NMR, LCMSMS | 16-17 |
| Synthesis Scheme and Spectral Characterization of Compound 7// H-APT NMR, TGDTA, LCMSMS | 18-19 |
| Cyclic voltammogram | 20 |
| Uv-Vis Spectrums of the Compounds (I) and (VI) | 21 |
| Dihedral Measurements of Compound (VI) | 22 |

**2 Materials and Methods**

**2.1 Instruments**

NMR spectra as 1H, 13C and 2D-NMR were recorded on a 500 MHz via Bruker AV500 and 400 MHz via AV400. High-resolution LCMSMS mass spectra were recorded in AB-Sciex Q-TRAP and GCMS were measured on an Agilent GC-MSD-7890B GC-5977MSD. Infrared measurements were performed on Perkin Elmer. UV–Vis absorption spectroscopy measurements were conducted on a Perkin-Elmer LAMBDA 650 UV/Vis spectrophotometer in the standard 10 mm photometric quartz cuvette using DMF solutions with concentrations of 10−5 M. The excitation and emission were obtained with a Cary Eclipse G9800A Fluorescence Spectrophotometer (Varian, USA) as 10-6 M concentrations in DMF. Measurements were carried out for several optical densities in the range from 0.06 to 0.12 absorbance units in 10 mm cuvette, measurement geometry – 90°. Cyclic voltammetry (CV) measurements were performed on a Gammry-References 3000 series electrochemical workstation using anhydrous solvent dimethylformamide and tetrabutylammonium hexafluorophosphate as the electrolyte at 0.1 M. The electrodes used were glassy carbon as the working, platinum wire and silver wire as the counter and reference electrodes respectively. All solutions were degassed using N2 and contained the analyte compound at concentrations of ca. 10-5 M. Thermogravimetric analysis curves were recorded on Hitachi/SII 7300. DSC measurements were performed on TA Q20 scanning calorimeter under N2 atmosphere at a heating rate of 10 °C/min.

**2.2 Synthetic procedure and characterization data**

Physical data and spectral characterization of compound **I**: colorless crystals, yield 80%, melting point 98°C. FTIR (KBr, ν) 3042-2958, 2950-2932, 1652-1618 (C=O), 1618-1576 cm-1. 1H NMR (500 MHz, CDCl3) δ 7.42 (d, *J* = 8.6 Hz, 2H), 7.34 (d, *J* = 8.5 Hz, 2H), 6.91 (q, *J*= 16.2 Hz, 2H), 6.08 (s, 1H), 2.46 (s, 2H), 2.27 (s, 2H), 1.11 (s, 6H) ppm. 13C NMR (125 MHz, CDCl3) δ 200.06, 154.22, 134.75, 134.49, 133.48, 130.13, 129.06, 128.90, 128.34, 127.46, 51.40, 39.02, 33.32, 28.48 ppm. LCMSMS: m/z = 305.22 (M+), 207, (C6H4Br+), 141(C9H11O+), 73(C6H4+). Elemental analysis for C16H17BrO, calculated: C, 62.96; H, 5.61; Found: C, 63.06; H, 5.41.

Physical data and spectral characterization of compound **II**: light-yellow solid, yield 70%, melting point 76°C. FTIR (KBr, ν) 3094, 2951-2862, 1601-1570, 1447-1381 cm-1. 1H NMR (500 MHz, CDCl3) δ 7.44 (dd, J = 8.1, 1.5 Hz, 1H), 7.18 (dt, J = 8.0, 3.9 Hz, 1H), 6.92 (d, J = 7.8 Hz, 2H), 6.21 (s, 1H), 2.54 (s, 2H), 2.36 (s, 2H), 1.12 (s, 6 H). 13C NMR (125 MHz, CDCl3) δ 202.14, 157.82, 155.35, 132.16, 130.44, 130.27, 129.18, 125.91, 123.03, 120.50, 116.48, 51.27, 38.95, 33.49, 28.50 ppm. GCMSMS: m/z = 242.20 (M+), Elemental analysis for C16H18O2, calculated: C, 79.31; H, 7.49; Found: C, 79.48; H, 7.31.

Physical data and spectral characterization of compound **III**: colorless solid, yield 70%, melting point 108°C. FTIR (KBr, ν) 3062, 3026, 2952, 2888, 2867, 2158 (C≡C) 1655, 1615, 1577-1484, 852, (Si-(CH3)3) cm-1. 1H NMR (500 MHz, CDCl3) δ 7.49 – 7.15 (m, 1H), 6.99 – 6.70 (m, 1H), 6.00 (s, 1H), 2.39 (s, 1H), 2.24 (s, 1H), 1.03 (s, 1H), 0.18 (s, 1H) ppm. 13C NMR (125 MHz, CDCl3) δ 200.26, 154.45, 136.05, 134.17, 132.49, 130.48, 127.59, 127.58, 123.72, 104.81, 96.29, 51.48, 39.08, 33.42, 28.57, 28.55 ppm. LCMSMS: m/z = 323.00 (M+). Elemental analysis for C12H26OSi, calculated: C, 78.21; H, 8.13; Found: C, 78.41; H, 8.04.

Physical data and spectral characterization of compound **V**: colorless solid, yield 75%, melting point 90°C. FTIR (KBr, ν) 3040- 2956, 2930, 2869, 2228 (C≡C gerilimi), 1656 (C=O gerilimi), 1617-1581, 1486, 1481, 1465, 1379 cm-1. 1H NMR (500 MHz, CDCl3) δ 7.32 (m, 4H), 6.84 (m, 2H), 5.99 (s, 1H), 2.39 (s, 1H), 2.35 (t, *J* = 7.1 Hz, 2H), 2.23 (s, 1H), 1.56 – 1.47 (m, 2H), 1.46 – 1.38 (m, 2H), 1.03 (s, 6H), 0.88 (t, *J* =7.3 Hz, 3H) ppm. 13C NMR (125 MHz, CDCl3) δ 200.18, 154.58, 135.07, 134.36, 133.74, 132.03, 131.55, 129.89, 128.68, 128.48, 127.33, 127.08, 124.88, 92.55, 80.50, 65.33, 33.37, 30.82, 30.42, 28.52, 22.07, 21.95, 19.26, 18.91, 13.68, 13.56 ppm. LCMSMS: m/z = 306.9 (M+). Elemental analysis for C22H26O, calculated: C, 86.23; H, 8.55; Found: C, 86.43; H, 8.34.

Physical data and spectral characterization of compound **VI**: colorless solid, yield 70%, melting point 85°C. FTIR (KBr, ν) 3032, 2956-2821, 1916 (C≡C), 1651 (C=O), 1614-1586 1485, 1468 cm-1. 1H NMR (500 MHz, CDCl3) δ 7.62 – 7.57 (m, 4H), 7.55 (d, *J* = 1.8 Hz, 1H), 7.54 (s, 1H), 7.43 (d, *J* = 2.0 Hz,

1H), 7.42 (d, *J* = 1.9 Hz, 1H), 7.32 (s, 1H), 7.14 – 6.83 (m, 2H), 6.16 (s, 1H), 2.55 (s, 1H), 2.39 (s, 1H), 1.18 (s, 1H) ppm. 13C NMR (125 MHz, CDCl3) δ 200.28, 154.49, 135.84, 134.21, 132.12, 131.68, 130.39, 128.54, 128.46, 127.56, 127.23, 123.93, 123.08, 91.28, 89.27, 51.49, 39.10, 33.43, 28.56 ppm. LCMSMS: m/z = 327.20 (M+1+). Elemental analysis for C24H22O, calculated: C, 88.31; H, 6.79; Found: C, 88.52; H, 6.59.

*Cleavage of TMS in compound* ***III*** *for obtained* ***IV***

Under nitrogene atmosphere, an oven dried roundbottom of flask were charged compound **III** (1.50 mmol) solution in newly dryed THF (20 mL) was added dried K2CO3 (5.5 mmol). The mixture was stirred 1 hour, upon finished reaction was filtered and evaportaed and the reaction mixture was purified column chromotgraphy to afford desired product.

Physical data and spectral characterization of compound **IV**: colorless solid, melting point 83°C. FTIR (KBr, ν) 3199, 3066, 3035, 2954, 2938, 2888, 2097 (C≡C) , 1648, 1615 (C=O), 1580, 1499, 1425 cm-1. 1H NMR (500 MHz, CDCl3) δ 7.42 (d, J = 8.5 Hz, 3H), 7.35 – 7.21 (m, 2H), 7.20 (s, 1H), 6.83 (d, *J* = 3.7 Hz, 2H), 6.01 (s, 1H), 2.39 (d, *J* = 0.9 Hz, 2H), 2.24 (s, 2H), 1.03 (s, 7H), 0.91 (s, 1H) ppm. 13C NMR (125 MHz, CDCl3) δ 200.32, 154.41, 134.97, 133.68, 132.10, 130.29, 128.69, 127.57, 123.12, 78.90, 51.45, 39.07, 33.41, 28.56, 28.54 ppm. LCMSMS: m/z = 250.10 (M+). Elemental analysis for C18H18O, calculated: C, 86.36; H, 7.25; Found: C, 86.55; H, 7.02.

*Synthesis method of the compound* ***VII***

To a stirred solution of compound **II** (1,1 mmol) in 10 mL dry- DMF were added freshly dried K2CO3 (1.8 mmol) After 10 min stirring at room temperature, the solution of the propargile bromide (2.5 mmol) in 5 mL DMF dropwisely. Upon completion reaction was extracted of brine: ethyle acetate mixture and collected organic phase dried MgSO4 and then evaporated, before purified via column chromatography.

Physical data and spectral characterization of compound **VII**: colorless solid, yield 65%, melting point 85°C. FTIR (KBr, ν) 3235, 2961-2870, 2117 (C≡C), 1639 (C=O), 1607, 1579, 1451 cm-1 . 1H NMR (400 MHz, CDCl3) δ 7.61 (dd, *J* = 7.7, 1.4 Hz, 1H), 7.39 (d, *J* = 16.4 Hz, 1H), 7.36 – 7.30 (m, 1H), 7.07 (s, 1H), 7.05 (dd, *J* = 8.7, 6.5 Hz, 1H), 6.96 (d, *J* = 16.4 Hz, 1H), 6.09 (s, 1H), 4.82 (d, *J* = 2.4 Hz, 2H), 2.57 (t, *J* = 2.4 Hz, 1H), 2.53 (s, 2H, H1), 2.33 (s, 2H), 1.14 (s, 6H) ppm. 13C NMR (101 MHz, CDCl3) δ 200.30, 155.07, 130.06, 129.02, 126.91, 125.10, 121.56, 112.60, 78.42, 76.05, 55.61, 50.93, 38.82, 32.79, 28.81 ppm. LCMSMS: m/z = 281.3 (M+1+). Elemental analysis for C19H20O2, calculated: C, 81.40; H, 7.19; Found: C, 81.59; H, 6.98.

| **Compounds** | **HOMO** | **LUMO** |
| --- | --- | --- |
| **I** | 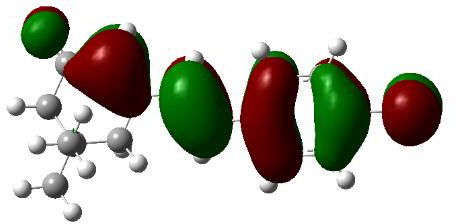 | 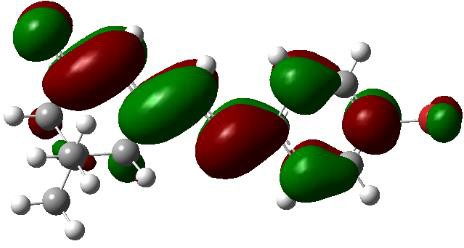 |
| **II** | 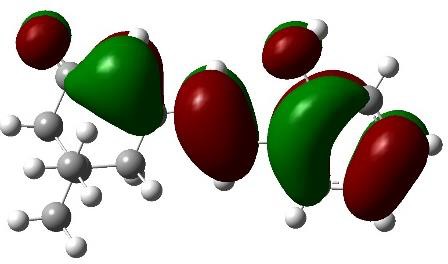 | 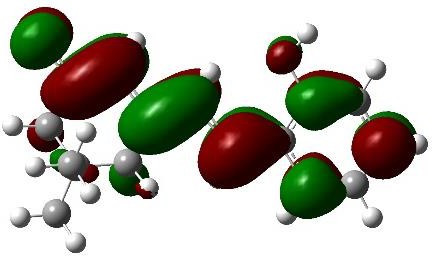 |
| **III** | 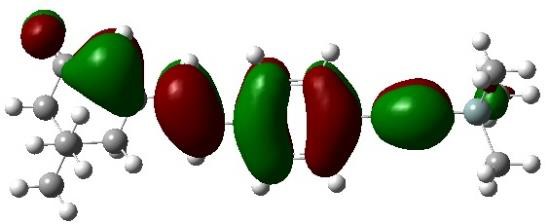 | 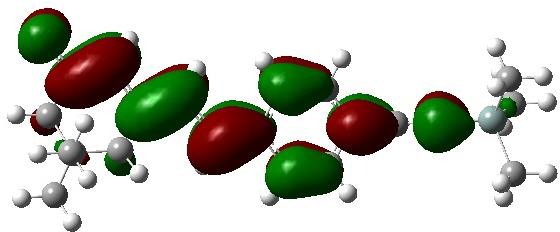 |
| **IV** | 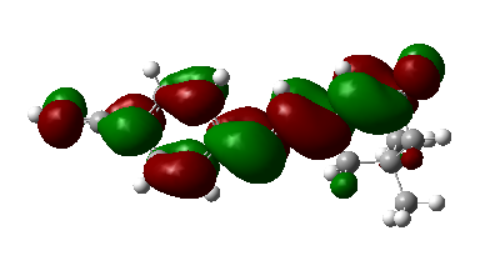 | 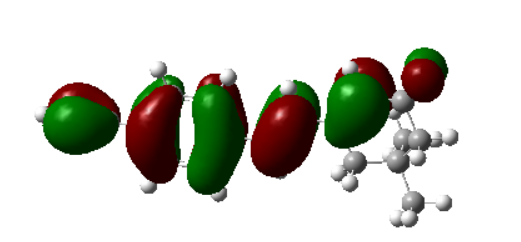 |
| **V** | 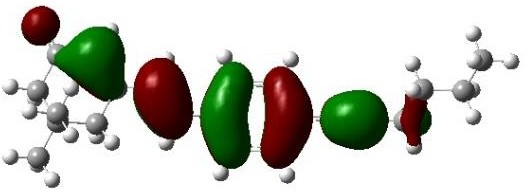 | 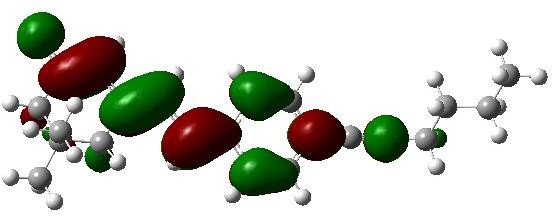 |
| **VI** | 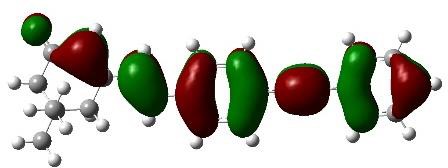 | 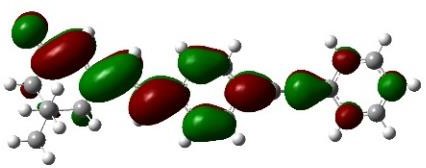 |
| **VII** | 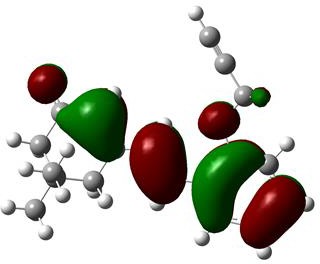 | 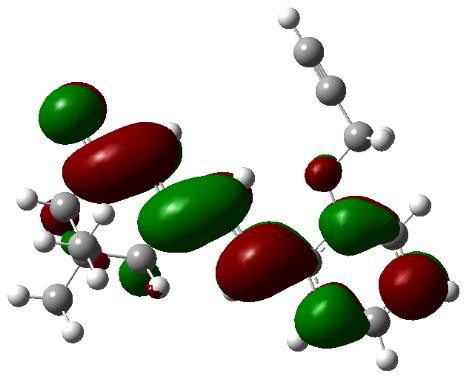 |

**Figure S1.** Distributions of electron density in HOMO and LUMO for compounds

# The Lippert-Mataga equation

The Lippert-Mataga equation is as follow:

(Eq. S1)

in which *Δν* = *νabs* - *νem* stands for Stokes shift, *νabs* and *νem* are absorption and emission frequency (cm-1), is the Planc’s constant, *c* is the velocity of light in vacuum, *a* is the Onsager radius and *b* is a constant. Δ*f* is the orientation polarizability, is the refractive index, *n* is the dielectric constant, *μe* and *μg* are the dipole moments of the emissive and ground states, respectively and *ε0* is the permittivity of the vacuum. (*μe*-*μg*) 2 is proportional to the slope of the Lippert-Mataga plot (S1-2).

S1: Mishra, A., Sahu, S., Tripathi, S., & Krishnamoorthy, G. (2014). Photoinduced intramolecular charge transfer in trans-2-[4′-(N, N-dimethylamino) styryl] imidazo [4, 5-b] pyridine: effect of introducing a C= C double bond. Photochemical & Photobiological Sciences, 13, 1476-1486.

S2: Ieuji, R., Goushi, K., & Adachi, C. (2019). Triplet–triplet upconversion enhanced by spin–orbit coupling in organic light-emitting diodes. Nature communications, 10(1), 5283.

**Synthesis Scheme and Spectral Characterization of Compound I**


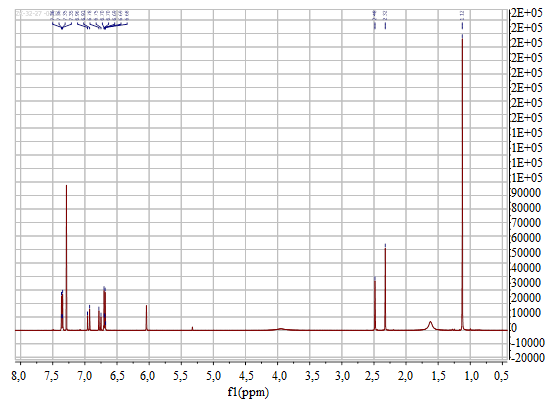


**Figure S2.** NMR detail of the compound I


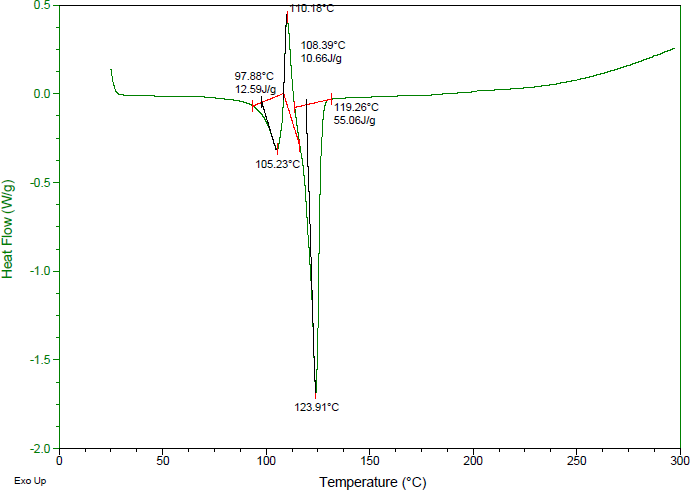


**Figure S3.** DSC plot of compound I


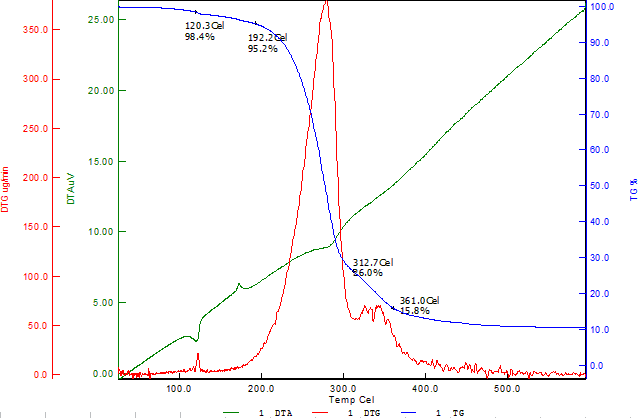


**Figure S4.** Thermogravimetric analysis of compound I

**Figure S5.** LCMSMS results of compound I

**Synthesis Scheme and Spectral Characterization of Compound II**


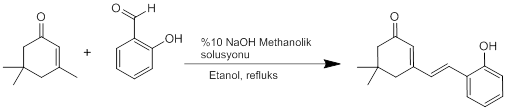


**Figure S6.** 1H and 13C NMR (APT) of compound II


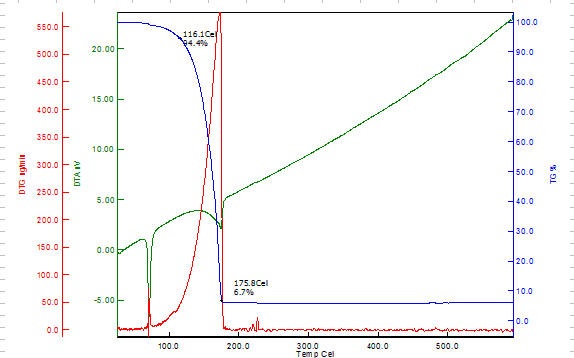


**Figure S7.** Thermogravimetric analysis of compound II


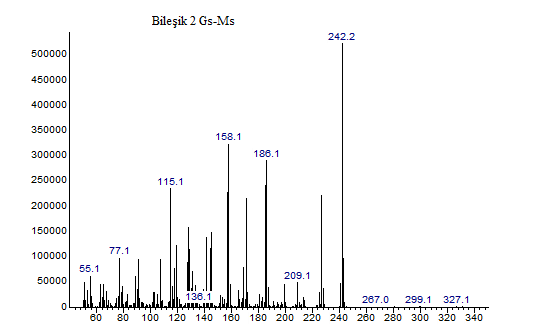


**Figure S8.** LCMSMS results of compound II

**Synthesis Scheme and Spectral Characterization of Compound III**

###

###

**Figure S9.** 1H and COSY 2D-NMR of compound III

**Figure S10.** 13C NMR (APT) of compound III


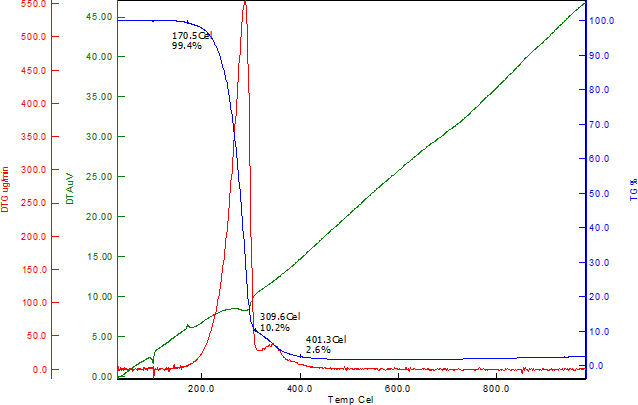


**Figure S11.** Thermogravimetric analysis of compound II

**Figure S12.** LCMSMS results of compound III

**Synthesis Scheme and Spectral Characterization of Compound IV**


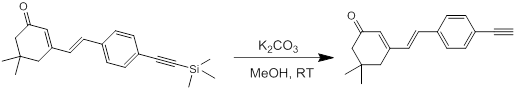


**Figure S13.** 1H and APT-NMR of compound IV


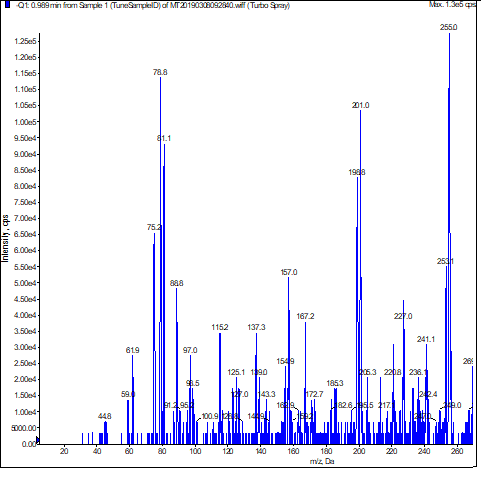


**Figure S14.** LCMSMS results of compound IV

**Synthesis Scheme and Spectral Characterization of Compound V**

###

**Figure S15.** 1H and 13C-NMR of compound V

**Figure S16.** APT NMR of compound V

###

**Figure S17.** LCMSMS results of compound V

**Synthesis Scheme and Spectral Characterization of Compound VI**

###

**Figure S18.** 1H and 13C-APT NMR of compound VI

**Figure S19.** LCMSMS results of compound VI

**Synthesis Scheme and Spectral Characterization of Compound VII**


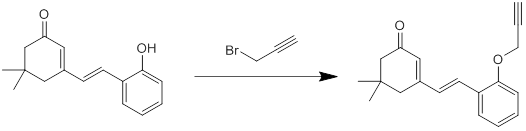


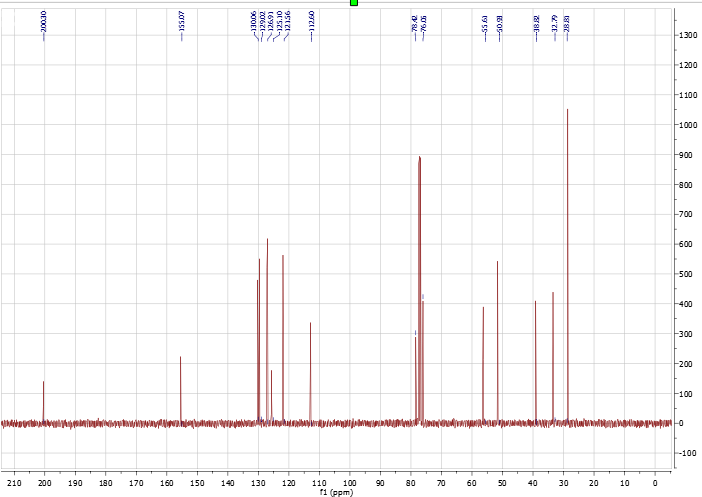


**Figure S20.** 1H and 13C NMR of compound VII

**Figure S21.** LCMSMS results of compound VII


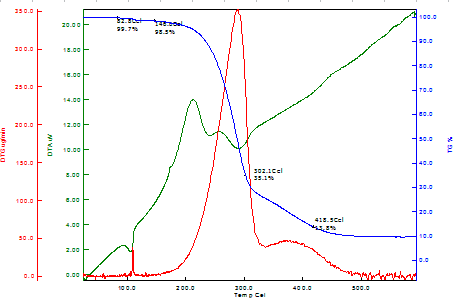


**Figure S22.** Thermogravimetric results of compound VII

**Figure S23.** Cyclic voltammogram of the compounds I-VII

|  |  |
| --- | --- |
|  | |

**Figure S24.** Compared UV-Vis spectrums of the compounds I-VI


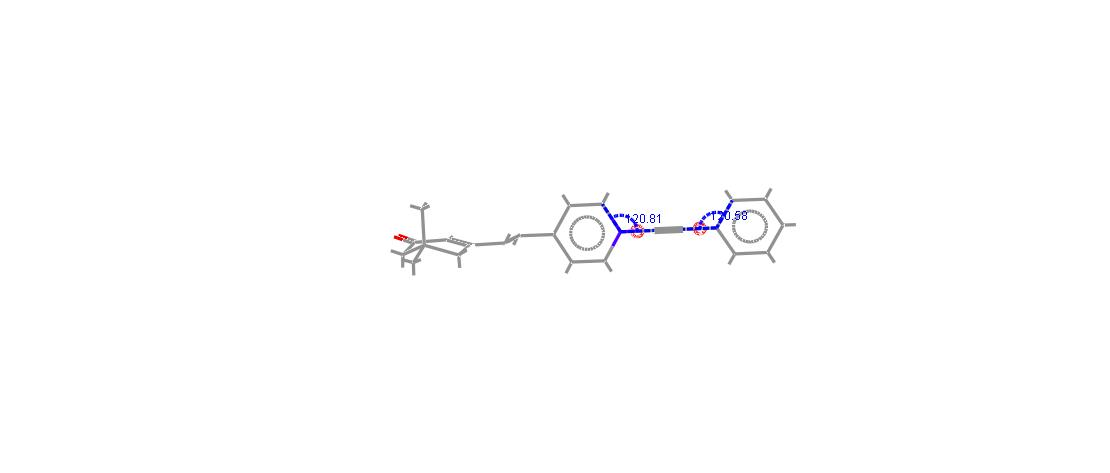


**Figure S25.** Dihedral Angle Measurements of VI
